# Supplementary material for: Structural and anti-oxidant properties of guanidinium pyrazole-3,5-dicarboxylates
Source: Royal Society of Chemistry journal article supplement (doi:10.1039/c6ce00290k), 2016-01-01
Supplement: c6ce00290k1.pdf [file c6ce00290k1.pdf]

***Electronic supplementary information (ESI)***

**Figs. 1-2**

IR Spectra of (GunH)<sub>2</sub>(Hpzdc).H<sub>2</sub>O (**2**) and (AgunH)<sub>2</sub>(Hpzdc).H<sub>2</sub>O (**4**)

**Figs. 3-4**

IR Spectra of (DagunH)(H<sub>2</sub>pzdc).H<sub>2</sub>O (**6**) and (TagunH)(H<sub>2</sub>pzdc)(H<sub>3</sub>pzdc) (**9**)

**Fig. 5-9**

PXRD Patterns of compounds **3, 5, 6, 7 & 8**

**Fig. 10-11**

Simultaneous TG/DTA of free acid (H<sub>3</sub>pzdc) and (AgunH)(H<sub>2</sub>pzdc).H<sub>2</sub>O (**3**)

**Fig. 12-13**

Simultaneous TG/DTA of (AgunH)(H<sub>2</sub>pdc)(H<sub>3</sub>pzdc) (**5**) and (DagunH)(H<sub>2</sub>pzdc).H<sub>2</sub>O (**6**)

**Fig. 14-15**

Simultaneous TG/DTA of (DagunH)<sub>2</sub>(Hpzdc).H<sub>2</sub>O (**7**) and (DagunH)(H<sub>2</sub>pzdc)(H<sub>3</sub>pzdc) (**8**)

**Table 1**

Selected bond lengths (Å) for the compounds **1, 2, 4 & 9**

**Table 2**

Selected bond angles (°) for the compounds **1, 2, 4 & 9**

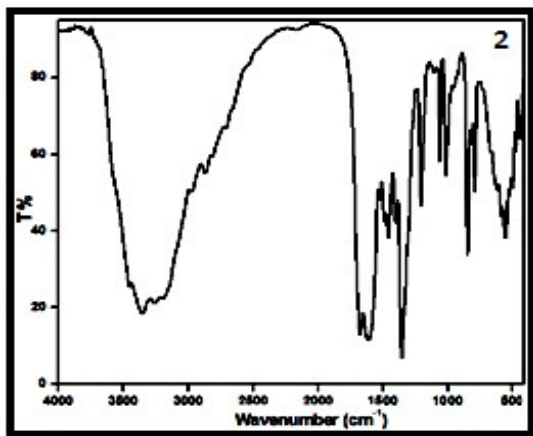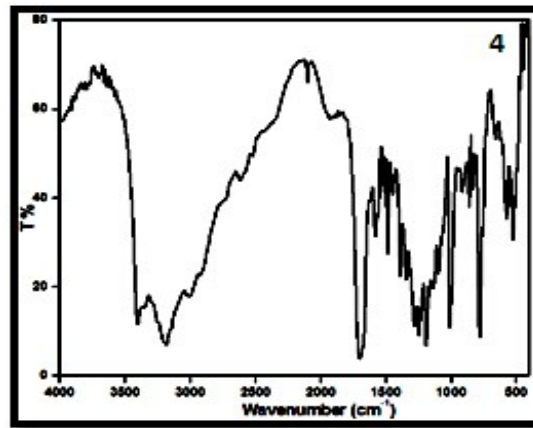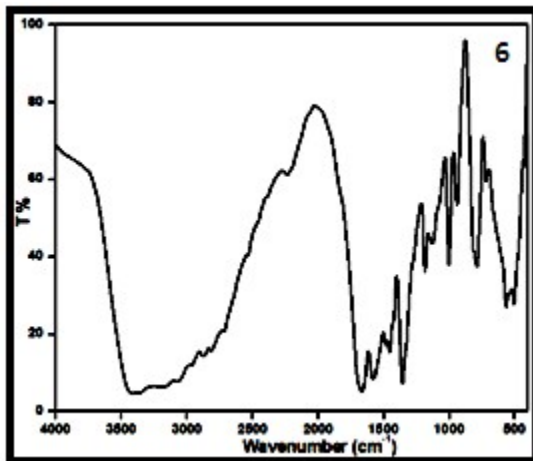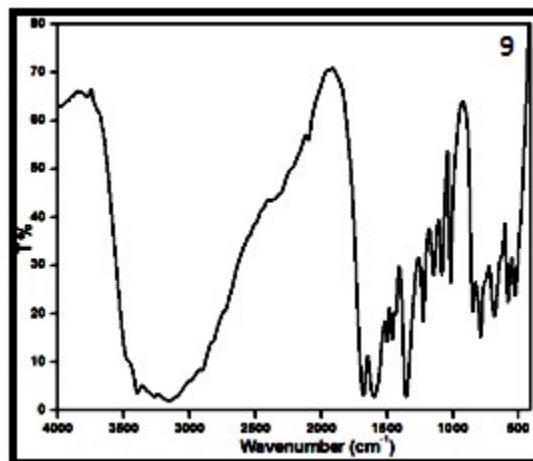

Figs. 1-4

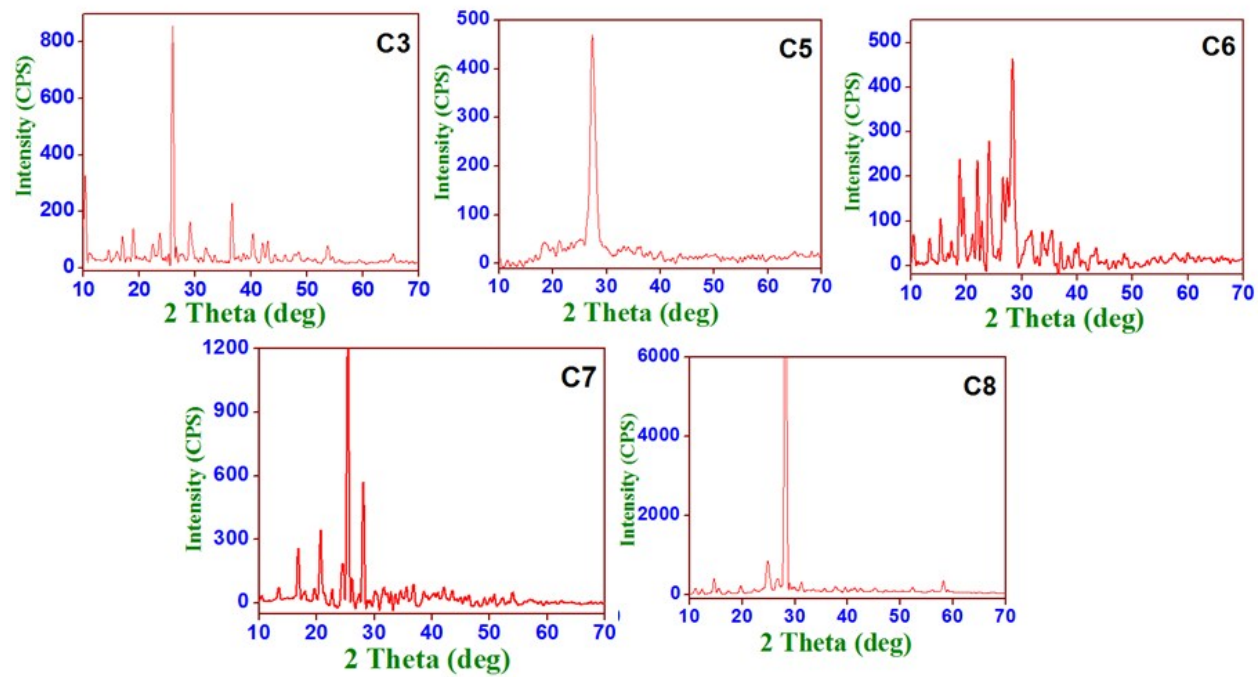

**Figs. 5-9**

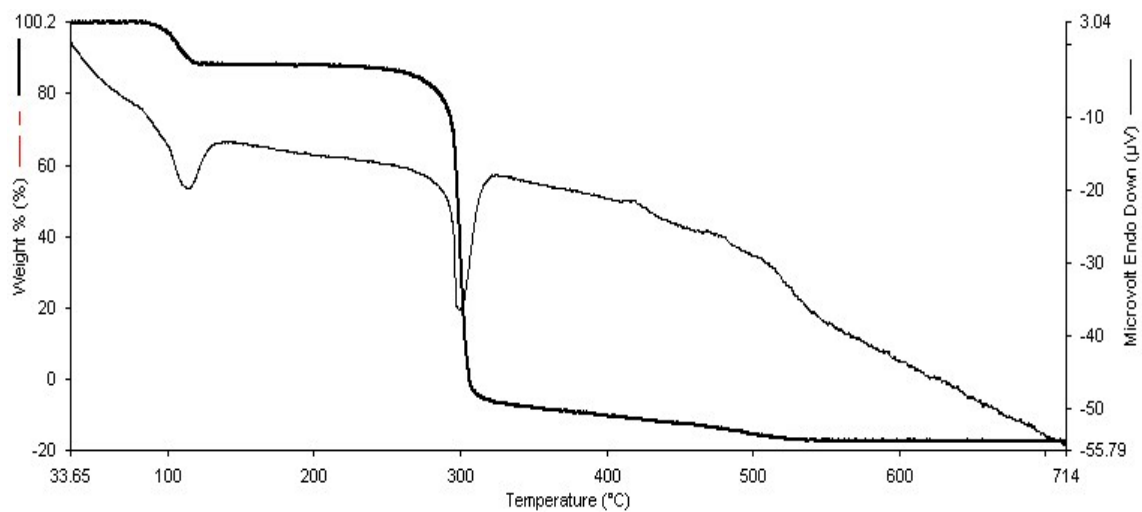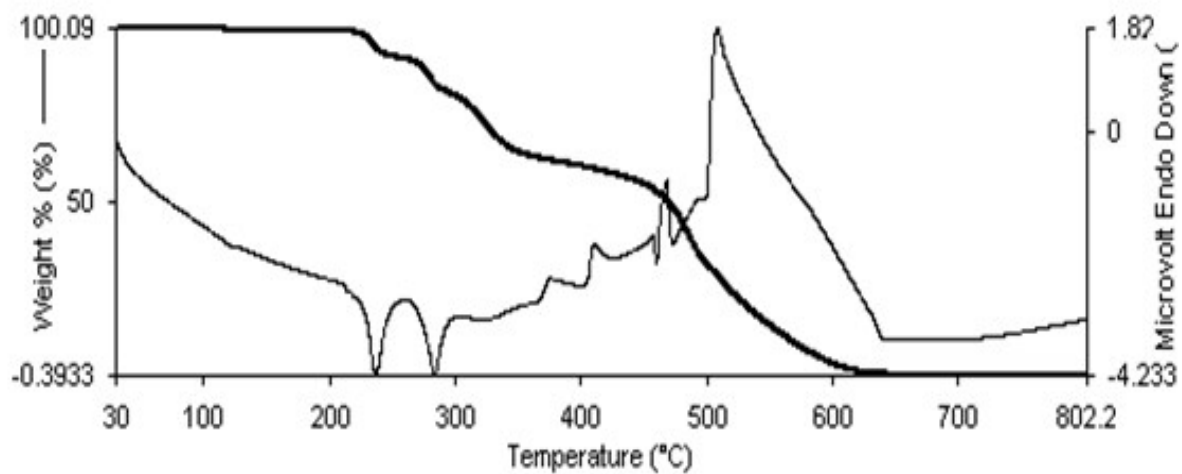

**Figs. 10-11**

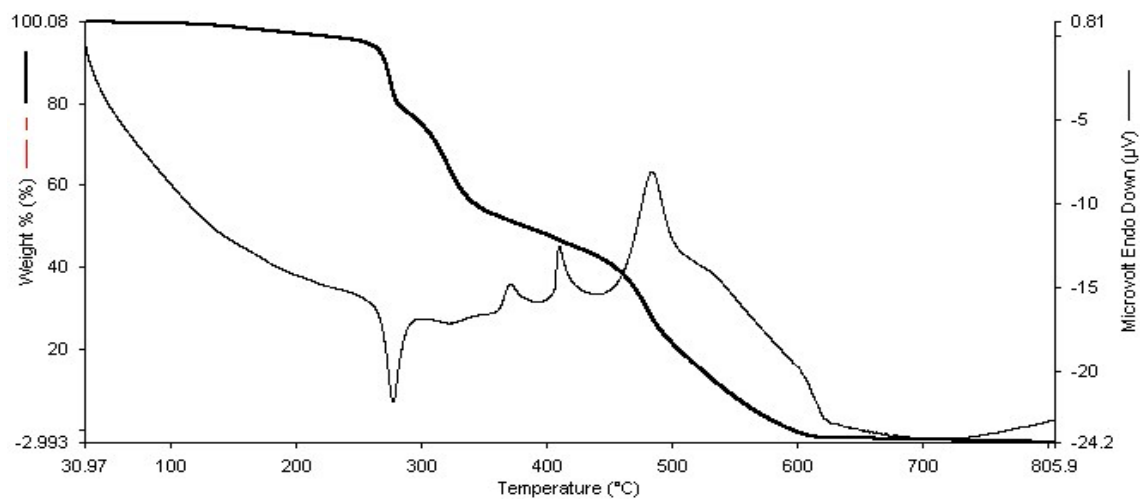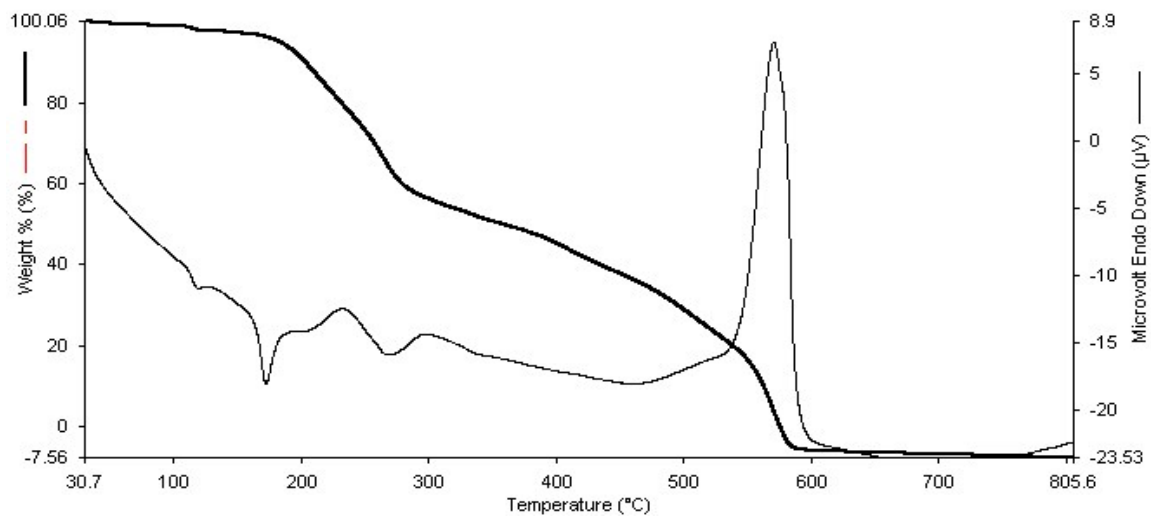

**Figs. 12-13**

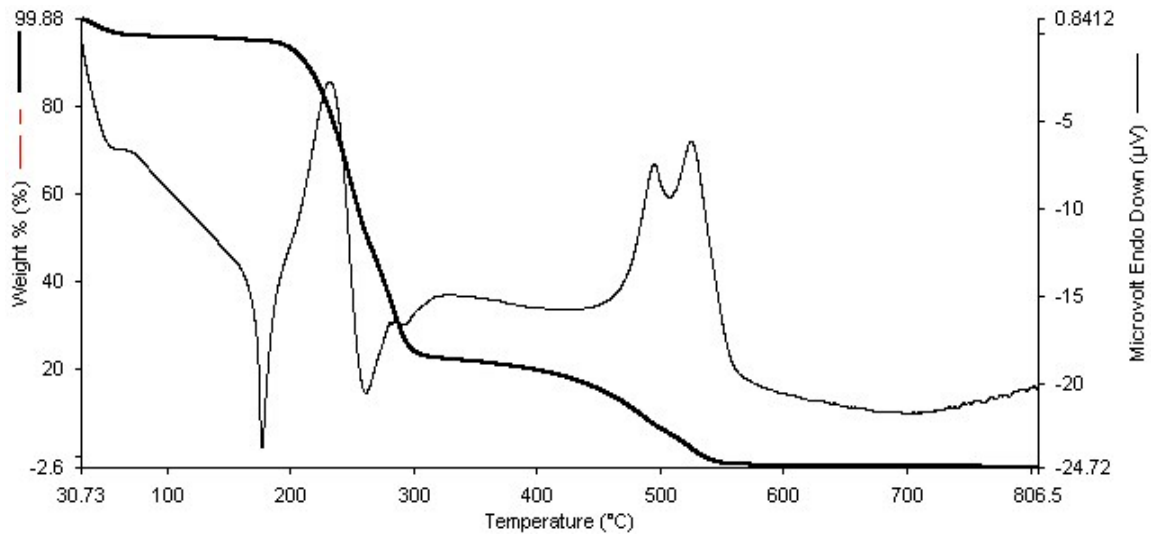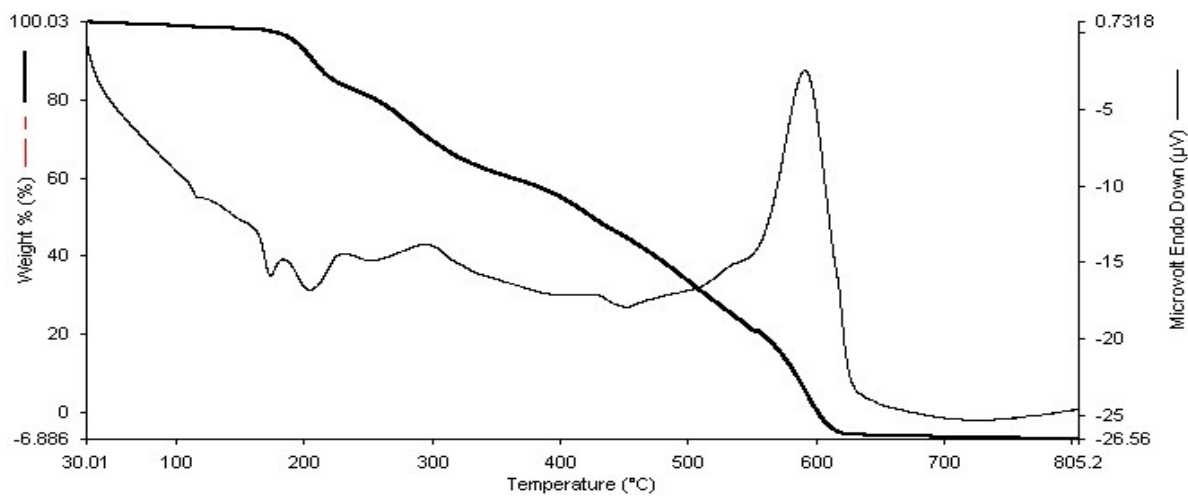

Figs. 14-15

**Table 1 Selected bond lengths (Å) for the compounds 1, 2, 4 & 9**

|    |     |            |    |     |            |          |     |     |            |     |     |            |
|----|-----|------------|----|-----|------------|----------|-----|-----|------------|-----|-----|------------|
| O1 | C1  | 1.2984(14) | N5 | C6  | 1.3220(15) |          | C2  | N2  | 1.3382(14) | N1  | N2  | 1.3346(12) |
| O2 | C5  | 1.2663(14) | N3 | C6  | 1.3154(15) | <b>1</b> | C3  | C4  | 1.3763(15) | C6  | N4  | 1.3279(15) |
| O3 | C1  | 1.2150(14) | C1 | C2  | 1.4819(14) |          | C4  | C5  | 1.4856(14) |     |     |            |
| O4 | C5  | 1.2481(13) | C2 | C3  | 1.3967(14) |          | C4  | N1  | 1.3497(13) |     |     |            |
| C1 | C2  | 1.497(7)   | C3 | C4  | 1.397(7)   |          | C7  | N3  | 1.324(7)   | C8  | N8  | 1.334(7)   |
| C1 | O1  | 1.256(6)   | C4 | C5  | 1.491(7)   |          | C7  | N4  | 1.316(6)   | N1  | N2  | 1.334(6)   |
| C1 | O3  | 1.261(5)   | C4 | N1  | 1.338(6)   | <b>2</b> | C7  | N5  | 1.319(7)   |     |     |            |
| C2 | C3  | 1.369(6)   | C5 | O2  | 1.244(6)   |          | C8  | N6  | 1.325(7)   |     |     |            |
| C2 | N2  | 1.330(6)   | C5 | O4  | 1.270(6)   |          | C8  | N7  | 1.319(7)   |     |     |            |
| O1 | C1  | 1.2558(13) | N2 | C4  | 1.3546(13) |          | C4  | C5  | 1.4809(14) | N21 | C21 | 1.3215(14) |
| N1 | N2  | 1.3427(12) | C2 | C3  | 1.4026(14) |          | N11 | C11 | 1.3270(14) | C21 | N22 | 1.3362(14) |
| N1 | C2  | 1.3452(13) | O3 | C5  | 1.2646(13) | <b>4</b> | C11 | N12 | 1.3377(15) | C21 | N23 | 1.3299(14) |
| C1 | O2  | 1.2569(13) | C3 | C4  | 1.3811(14) |          | C11 | N13 | 1.3235(14) | N23 | N24 | 1.4074(13) |
| C1 | C2  | 1.4961(14) | O4 | C5  | 1.2555(13) |          | N13 | N14 | 1.4158(14) |     |     |            |
| O2 | C1  | 1.2429(16) | N9 | N10 | 1.4141(18) |          | C2  | N1  | 1.3555(17) | C10 | C9  | 1.4757(17) |
| O3 | C5  | 1.2412(18) | O8 | C10 | 1.2912(16) |          | N6  | N5  | 1.3988(19) | C9  | C8  | 1.3738(18) |
| O4 | C5  | 1.2835(16) | O5 | C6  | 1.2842(17) |          | N6  | C11 | 1.326(2)   | C9  | N4  | 1.3503(17) |
| O1 | C1  | 1.2672(16) | O6 | C6  | 1.2394(18) | <b>9</b> | C3  | C4  | 1.3952(18) | C8  | C7  | 1.3965(18) |
| N8 | N7  | 1.4124(19) | O7 | C10 | 1.2234(16) |          | C4  | C5  | 1.4679(18) | C7  | C6  | 1.4644(18) |
| N7 | C11 | 1.326(2)   | C1 | C2  | 1.4807(17) |          | C4  | N2  | 1.3347(18) | C7  | N3  | 1.3352(17) |
| N9 | C11 | 1.3264(19) | C2 | C3  | 1.3759(18) |          | N2  | N1  | 1.3301(15) | N3  | N4  | 1.3265(15) |

**Table 1**

**Table 2 Selected bond angles (°) for the compounds 1, 2, 4 & 9**

|     |    |     |            |     |     |     |            |     |     |     |            |
|-----|----|-----|------------|-----|-----|-----|------------|-----|-----|-----|------------|
| O1  | C1 | C2  | 113.03(9)  | C4  | C3  | C2  | 104.86(9)  | O4  | C5  | C4  | 116.84(10) |
| O3  | C1 | O1  | 125.01(10) | C3  | C4  | C5  | 133.09(10) | N2  | N1  | C4  | 113.01(9)  |
| O3  | C1 | C2  | 121.95(10) | N1  | C4  | C3  | 106.27(9)  | N1  | N2  | C2  | 104.50(8)  |
| C3  | C2 | C1  | 127.56(10) | N1  | C4  | C5  | 120.58(9)  | N5  | C6  | N4  | 120.81(11) |
| N2  | C2 | C1  | 121.07(9)  | O2  | C5  | C4  | 117.15(9)  | N3  | C6  | N5  | 120.72(11) |
| N2  | C2 | C3  | 111.35(9)  | O4  | C5  | O2  | 126.00(10) | N3  | C6  | N4  | 118.47(11) |
| O1  | C1 | C2  | 117.7(4)   | C3  | C4  | C5  | 127.9(4)   | N4  | C7  | N3  | 119.9(5)   |
| O1  | C1 | O3  | 125.3(4)   | N1  | C4  | C3  | 110.6(4)   | N4  | C7  | N5  | 120.7(5)   |
| O3  | C1 | C2  | 117.0(4)   | N1  | C4  | C5  | 121.5(4)   | N7  | C8  | N6  | 119.4(5)   |
| C3  | C2 | C1  | 131.7(4)   | O2  | C5  | C4  | 117.1(4)   | N7  | C8  | N8  | 120.3(5)   |
| N2  | C2 | C1  | 121.5(4)   | O4  | C5  | C4  | 118.0(4)   | N8  | C8  | N6  | 120.3(5)   |
| N2  | C2 | C3  | 106.7(4)   | O4  | C5  | O2  | 124.9(4)   | N2  | N1  | C4  | 104.6(4)   |
| C2  | C3 | C4  | 105.0(4)   | N3  | C7  | N5  | 119.4(5)   | N1  | N2  | C2  | 113.1(4)   |
| N2  | N1 | C2  | 104.56(8)  | C4  | C3  | C2  | 104.77(9)  | N13 | C11 | N11 | 121.24(11) |
| O1  | C1 | O2  | 124.89(10) | N2  | C4  | C3  | 106.58(9)  | N13 | C11 | N12 | 119.49(10) |
| O1  | C1 | C2  | 116.91(9)  | N2  | C4  | C5  | 121.64(9)  | C11 | N13 | N14 | 117.61(9)  |
| O2  | C1 | C2  | 118.19(9)  | C3  | C4  | C5  | 131.75(10) | N21 | C21 | N22 | 120.18(10) |
| N1  | N2 | C4  | 112.74(9)  | O3  | C5  | C4  | 117.08(9)  | N21 | C21 | N23 | 121.86(10) |
| N1  | C2 | C1  | 121.02(9)  | O4  | C5  | O3  | 124.86(10) | N23 | C21 | N22 | 117.95(10) |
| N1  | C2 | C3  | 111.35(9)  | O4  | C5  | C4  | 118.03(9)  | C21 | N23 | N24 | 119.98(9)  |
| C3  | C2 | C1  | 127.63(9)  | N11 | C11 | N12 | 119.27(11) |     |     |     |            |
| C11 | N7 | N8  | 118.39(14) | N2  | C4  | C5  | 120.18(12) | C8  | C9  | C10 | 132.72(12) |
| C11 | N9 | N10 | 119.51(13) | O3  | C5  | O4  | 124.63(13) | N4  | C9  | C10 | 120.61(11) |
| O2  | C1 | O1  | 125.45(12) | O3  | C5  | C4  | 119.24(12) | N4  | C9  | C8  | 106.67(11) |
| O2  | C1 | C2  | 118.75(12) | O4  | C5  | C4  | 116.13(12) | C9  | C8  | C7  | 104.17(11) |
| O1  | C1 | C2  | 115.80(11) | N1  | N2  | C4  | 104.41(11) | C8  | C7  | C6  | 127.92(13) |
| C3  | C2 | C1  | 132.14(12) | N2  | N1  | C2  | 112.92(11) | N3  | C7  | C8  | 111.81(11) |
| N1  | C2 | C1  | 121.54(11) | N7  | C11 | N9  | 120.05(14) | N3  | C7  | C6  | 120.25(12) |
| N1  | C2 | C3  | 106.31(11) | N6  | C11 | N7  | 119.60(13) | O5  | C6  | C7  | 116.21(13) |
| C11 | N6 | N5  | 124.11(12) | N6  | C11 | N9  | 120.32(13) | O6  | C6  | O5  | 124.32(13) |
| C2  | C3 | C4  | 104.47(11) | O8  | C10 | C9  | 114.11(11) | O6  | C6  | C7  | 119.47(13) |
| C3  | C4 | C5  | 127.94(12) | O7  | C10 | O8  | 124.79(12) | N4  | N3  | C7  | 104.45(11) |
| N2  | C4 | C3  | 111.89(11) | O7  | C10 | C9  | 121.10(12) | N3  | N4  | C9  | 112.90(11) |

**Table 2**
